# Supplementary material for: Comprehensive transcriptomic view of the role of the LGALS12 gene in porcine subcutaneous and intramuscular adipocytes
Source: PubMed Central journal article supplement (PMC6582507; doi:10.1186/s12864-019-5891-y), 2019-06-18

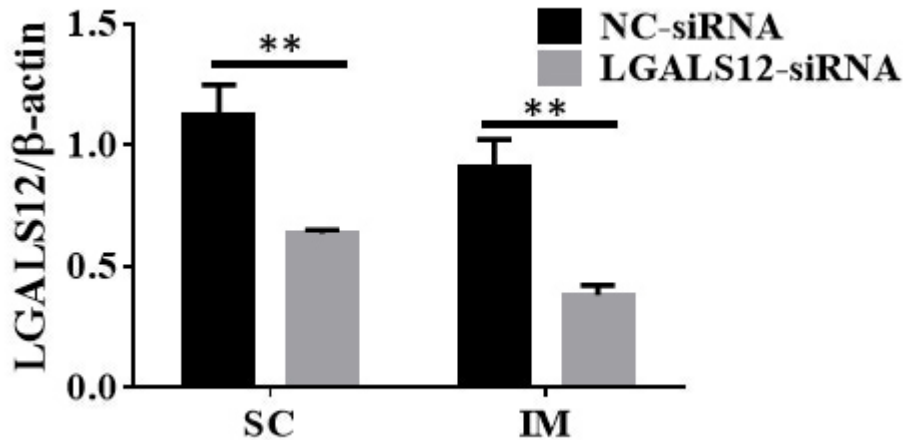

Supplement: 12864_2019_5891_MOESM1_ESM.pdf [file 12864_2019_5891_MOESM1_ESM.pdf]
